# Supplementary material for: Nanostructured 3D porous hybrid network of N-doped carbon, graphene and Si nanoparticles as an anode material for Li-ion batteries
Source: Royal Society of Chemistry journal article supplement (doi:10.1039/c7nj02154b), 2017-01-01
Supplement: c7nj02154b1.pdf [file c7nj02154b1.pdf]

New Journal of Chemistry - Supporting information

## Nanostructured 3D porous hybrid network of N-doped carbon, graphene and Si nanoparticles as anode material for Li-ion batteries

Walid Alkarmo,<sup>a</sup> Abdelhafid Aqil,<sup>\*,a</sup> Farid Ouhib,<sup>a</sup> Jean-Michel Thomassin,<sup>a</sup> Driss Mazouzi,<sup>b</sup>  
Dominique Guyomard,<sup>b</sup> Christophe Detrembleur,<sup>a</sup> Christine Jérôme<sup>\*,a</sup>

<sup>a</sup> Centre for Education and Research on Macromolecules, CESAM Research Unit, Chemistry Department, University of Liege, Sart-Tilman B6a, Allée de la Chimie 4000 Liège, Belgium

<sup>b</sup> Institut des Matériaux Jean Rouxel (IMN), CNRS UMR 6502, Université de Nantes,  
Nantes Cedex 3, France

### Supporting Figures

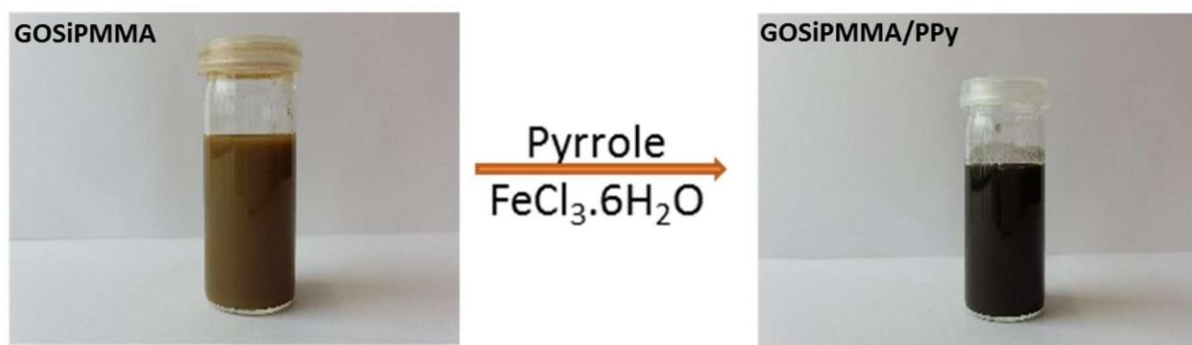

Figure S1. Suspension of Si@GO@PMMA before and after polymerization of Pyrrole.

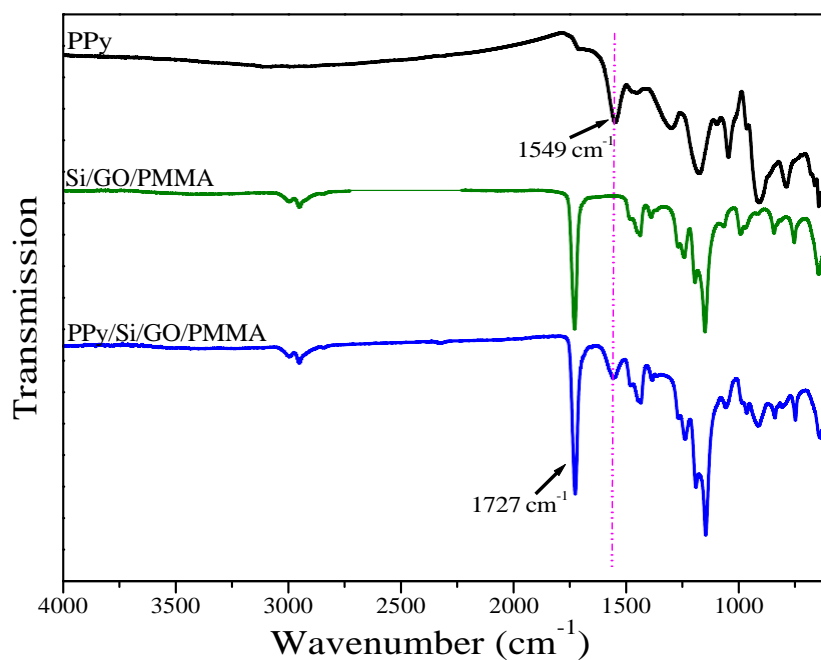

Figure S2. FTIR-ATR spectrum of PPy, Si/GO/PMMA and PPy/Si/GO/PMMA. The characteristic peaks of PMMA/GO (C–O at  $1147\text{ cm}^{-1}$ , C–O–C at  $1435\text{ cm}^{-1}$  and C=O at  $1727\text{ cm}^{-1}$ , green line) and the characteristic peaks of PPy (alkane (C–H) deformation at  $1455\text{ cm}^{-1}$ , alkane (C–H) bend vibration between  $500\text{--}1000\text{ cm}^{-1}$ , N–H deformation at  $1549\text{ cm}^{-1}$ , black line) were all observed in the spectrum of PPy/Si/GO/PMMA (blue line). These FT-IR results indicated that the PPy was successfully grafted on the surface of Si/GO/PMMA particles.

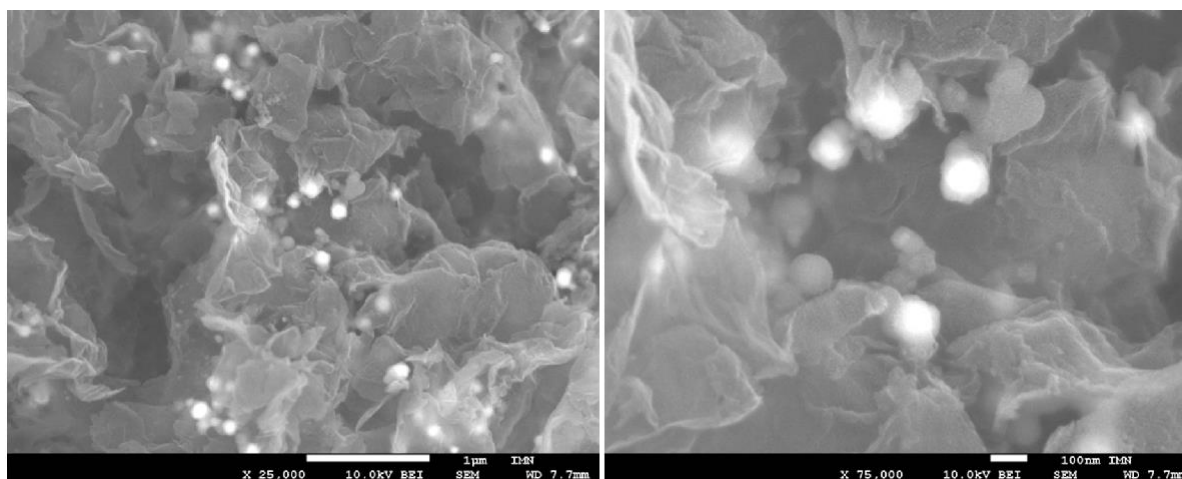

Figure S3. Backscattered electron images (BEIs) of the G@Si@C composite.

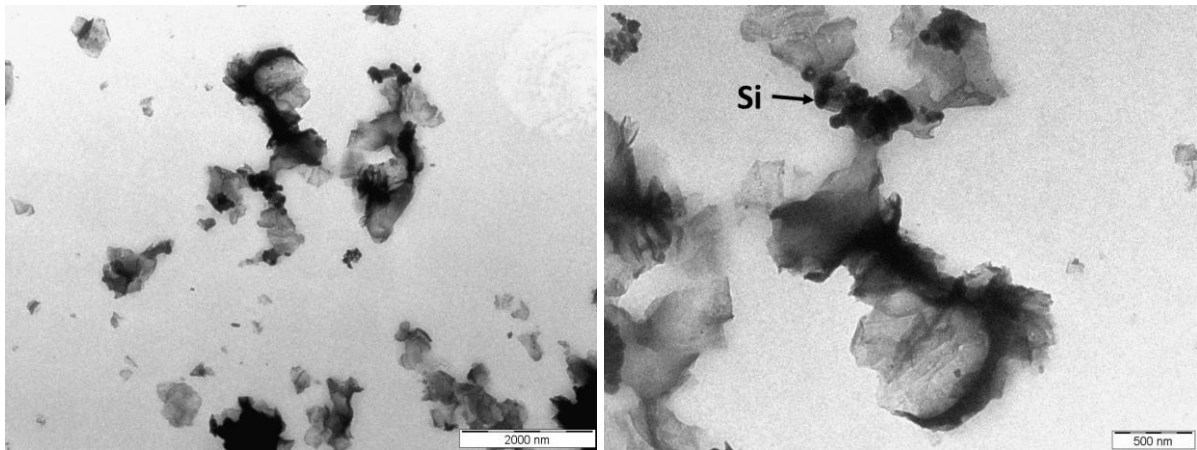

Figure S4: TEM analysis of the finale product G@Si@C at different magnification.

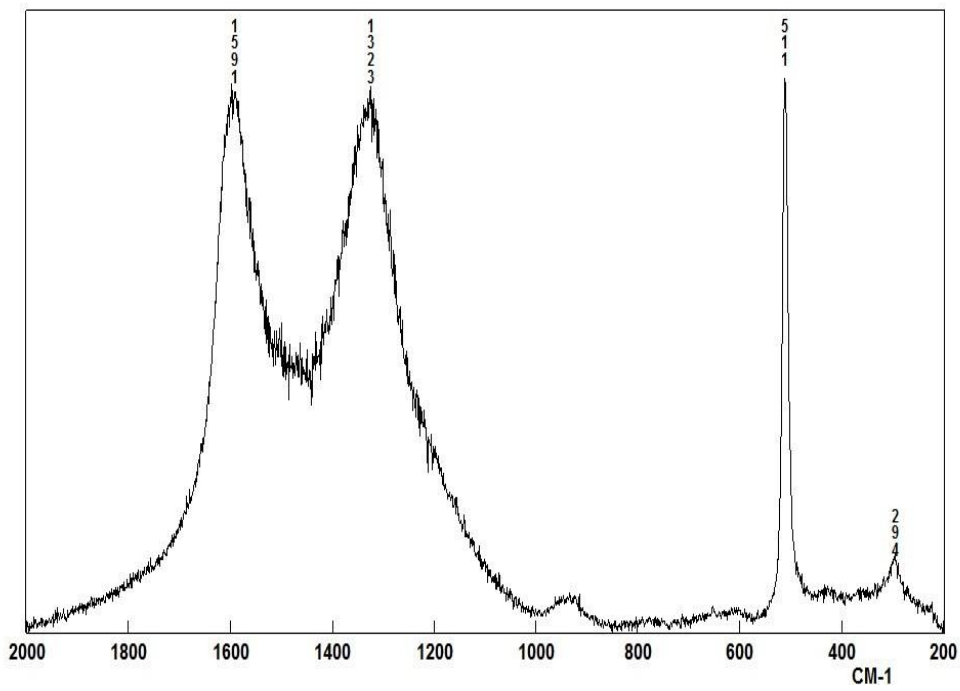

Figure S5. Raman spectra of G@Si@C.

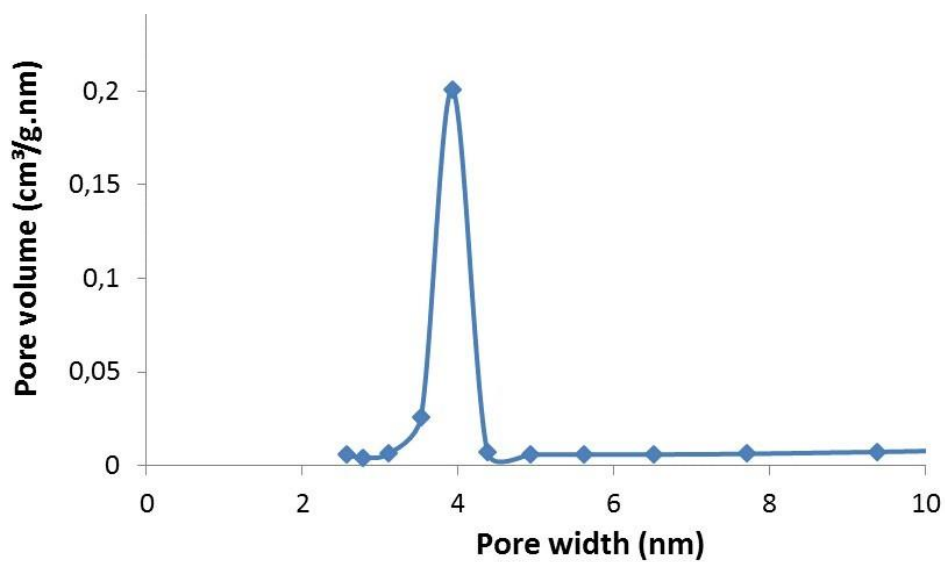

Figure S6. The uniform pore size distribution peaks of G@Si@C centred at 4 nm.

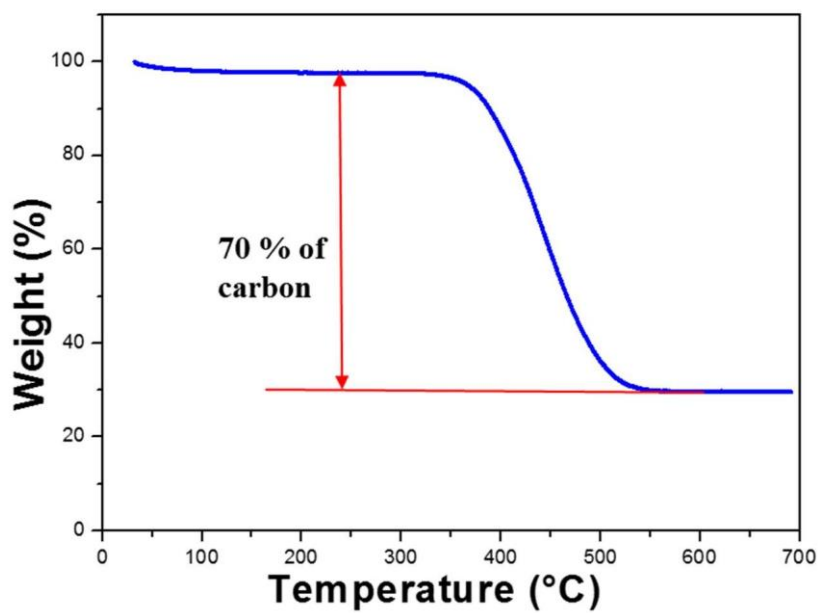

Figure S7. TGA analysis of G@Si@C under air.

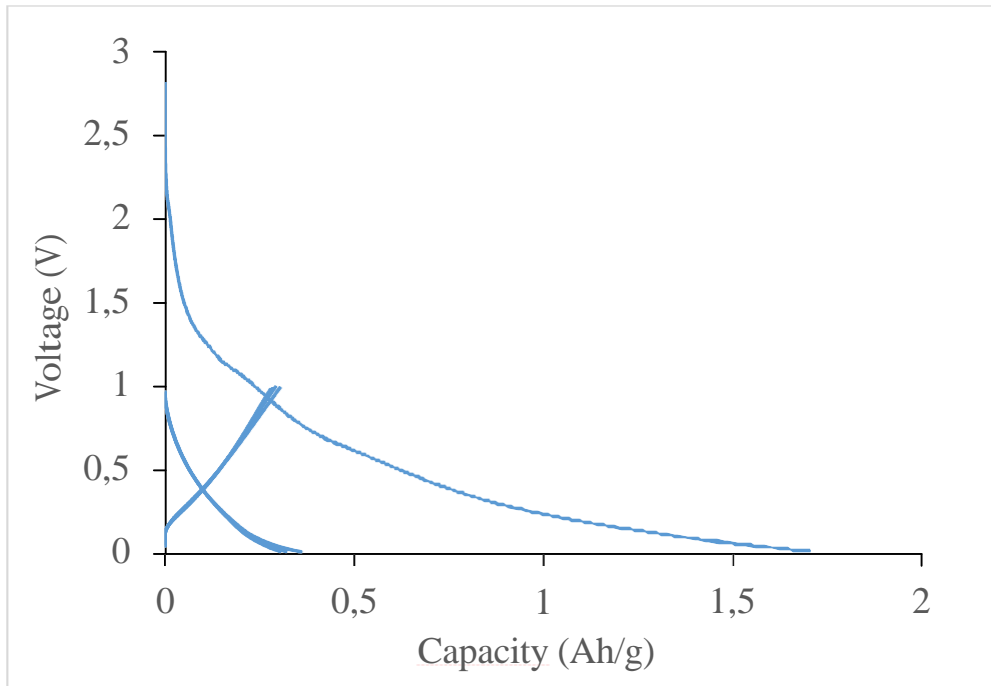

Figure S8. Galvanostatic charge/discharge curves measured for the G@C anode obtained using the same process.

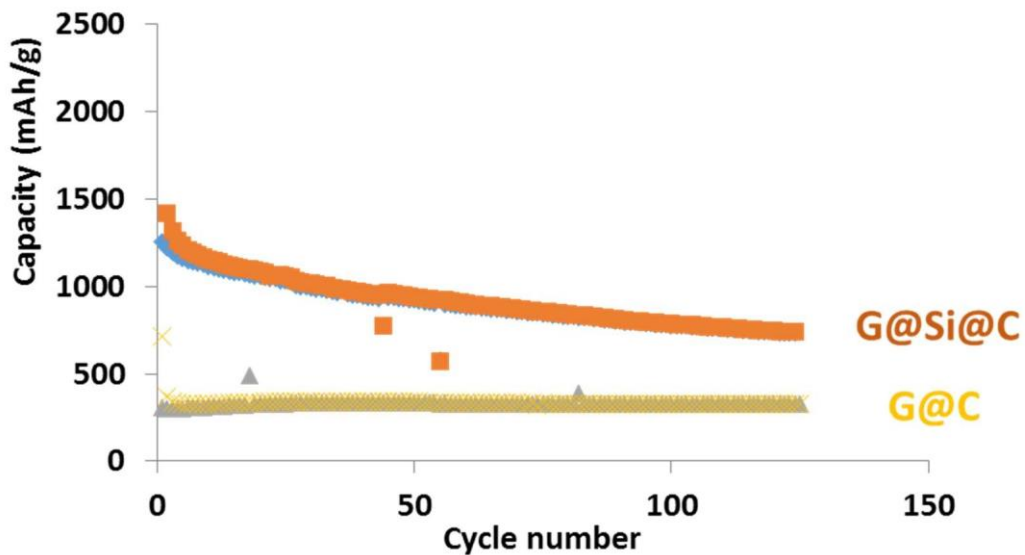

Figure S9. Reversible discharge charge capacity versus cycle plot for the G@C and G@Si@C electrodes, based on the total electrode weight.
